# Supplementary material
Source: MDPI journal article supplement (https://www.mdpi.com/2079-6412/13/8/1439)
Supplement: s1 [file s1]

## Supplementary Material

### Article

# Green Synthesis and Antibacterial Activity of Silver Nanoparticles obtained from *Moringa oleifera* Seed Cake

Nuno Coelho<sup>1,2</sup>, João P. Jacinto<sup>1,2</sup>, Rodrigo Silva<sup>1,2</sup>, Jéssica C. Soares<sup>1,†</sup>, Alice S. Pereira<sup>1,2,\*</sup> and Pedro Tavares<sup>1,2,\*</sup>

<sup>1</sup> UCIBIO – Applied Molecular Biosciences Unit, Department of Chemistry, NOVA School of Science and Technology, Universidade NOVA de Lisboa, 2829-516 Caparica, Portugal

<sup>2</sup> Associate Laboratory i4HB – Institute for Health and Bioeconomy, NOVA School of Science and Technology, Universidade NOVA de Lisboa, 2829-516 Caparica, Portugal

† Current Address: Biochemistry, Technische Universität Kaiserslautern, Germany

\* Correspondence pabt@fct.unl.pt (P.T.) and masp@fct.unl.pt (A.S.P.)

## Index

|                                                                  |   |
|------------------------------------------------------------------|---|
| Table S1 – Seed cake composition. ....                           | 2 |
| Table S2 – Particle size estimation using DLS spectroscopy. .... | 3 |
| Table S3 – Secondary structure estimation using FTIR data. ....  | 3 |

**Table S1 – Seed cake composition.**

| Parameters                  | Quantity (per 100 g) |
|-----------------------------|----------------------|
| Total protein content       | 47.9 g               |
| L-Alanine                   | 1.6 g                |
| L-Arginine                  | 6.13 g               |
| L-Aspartic acid             | 1.78 g               |
| L-Glutamic acid             | 8.36 g               |
| Glycine                     | 2.08 g               |
| L-Histidine                 | 0.904 g              |
| L-Isoleucine                | 1.25 g               |
| L-Leucine                   | 2.25 g               |
| L-Lysine                    | 0.56 g               |
| L-Methionine                | 0.821 g              |
| L-Phenylalanine             | 1.64 g               |
| L-Proline                   | 2.21 g               |
| L-Serine                    | 1.23 g               |
| L-Threonine                 | 1.0 g                |
| L-Tyrosine                  | 0.646 g              |
| Valine                      | 1.54 g               |
| Total lipid content         | 17.1 g               |
| Saturated fatty acids       | 3.5 g                |
| Monounsaturated fatty acids | 12.3 g               |
| Polyunsaturated fatty acids | 0.2 g                |
| Ascorbic acid               | 10 mg                |
| Tiamin                      | 657 µg               |

Data provided by Naturinga – Sociedade de Comercialização de Produtos da Natureza, Lda. The seed cake composition is representative of the seed cake batch used for silver nanoparticle synthesis, obtained as a subproduct in the proprietary process of oil extraction by cold pressing the seeds of the plant.

**Table S2 – Particle size estimation using DLS spectroscopy.**

| Sample                  | Seed cake quantity (g) | Particle Size (nm) | SD (nm) | PDI |
|-------------------------|------------------------|--------------------|---------|-----|
| AgNPs                   | 5                      | ND                 |         |     |
|                         | 10                     | 174                | 35      | 0.8 |
|                         | 15                     | 201                | 36      | 0.6 |
|                         | 25                     | 267                | 39      | 0.4 |
| Synthesis control       | 10                     | ND                 |         |     |
| Seed cake extract       | 10                     | ND                 |         |     |
| AgNO <sub>3</sub> (aq.) | –                      | ND                 |         |     |

The hydrodynamic diameter of particles was assessed by DLS spectroscopy for different samples and synthesis products. Seed cake quantity refers to the amount of seed cake used in extracts preparation (as described in section 2.1). Synthesis control refers to the final product of the reaction done accordingly with section 2.3 replacing the aqueous AgNO<sub>3</sub> by Milli-Q grade water. ND – not detected; SD – standard deviation; PDI – polydispersity.

**Table S3 – Secondary structure estimation using FTIR data.**

| Wavenumber (cm <sup>-1</sup> ) | Structure assignment | Fractional Area (%) |
|--------------------------------|----------------------|---------------------|
| Synthesis control              |                      |                     |
| 1612                           | β-sheet              | 16                  |
| 1630                           | β-sheet              | 14                  |
| 1639                           | Random coil          | 6                   |
| 1648                           | α-helix              | 20                  |
| 1658                           | α-helix              | 10                  |
| 1670                           | β-sheet              | 34                  |
| AgNPs                          |                      |                     |
| 1611                           | β-sheet              | 9                   |
| 1625                           | β-sheet              | 7                   |
| 1638                           | Random coil          | 12                  |
| 1649                           | α-helix              | 40                  |
| 1661                           | α-helix              | 19                  |
| 1675                           | β-sheet              | 13                  |

FTIR data were obtained for AgNPs and control samples. In the case of the “Synthesis control” data was collected for the final product of the reaction done accordingly with section 2.3 replacing the aqueous AgNO<sub>3</sub> by Milli-Q grade water. Values were obtained by deconvolution of each FTIR spectrum in the 1700–1550 cm<sup>-1</sup> energy region. Spectral deconvolution was obtained after normalization to the total area of the amide I band, using a gaussian band-fitting model with six different species. The percent of the area is listed for each secondary structure element assignment. For further details see Chapter 7 in “B. Stuart. Infrared Spectroscopy: Fundamentals and Applications. 2004 John Wiley & Sons, Ltd ISBNs: 0-470-85427-8 (HB); 0-470-85428-6 (PB)”.
